# Supplementary material for: Band Gap Implications on Nano-TiO2 Surface Modification with Ascorbic Acid for Visible Light-Active Polypropylene Coated Photocatalyst
Source: PubMed Central journal article supplement (PMC6116251; doi:10.3390/nano8080599), 2018-08-07
Supplement: nanomaterials-08-00599-s001.pdf [file nanomaterials-08-00599-s001.pdf]

Supplementary materials:

## Band gap implications on nano-TiO<sub>2</sub> surface modification with ascorbic acid for visible light-active polypropylene coated photocatalyst

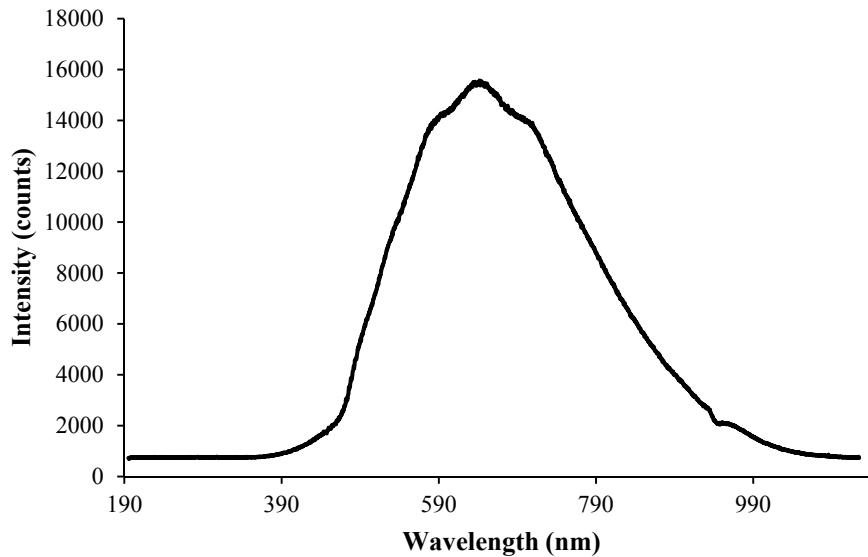

Figure S1. Emission spectrum of tubular lamp (100W, 1800 Lumen, LYVIA).

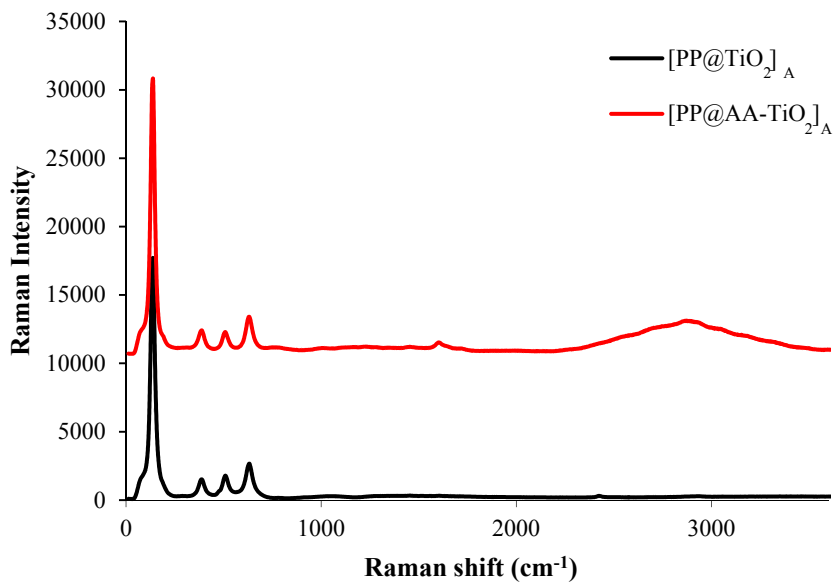

Figure S2. Raman spectra of [PP@TiO<sub>2</sub>]<sub>A</sub> and [PP@AA-TiO<sub>2</sub>]<sub>A</sub> containing 2.5 wt % of AA.

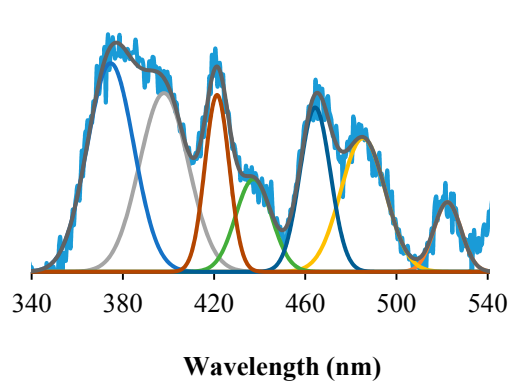

(a)  $[\text{TiO}_2]_A$

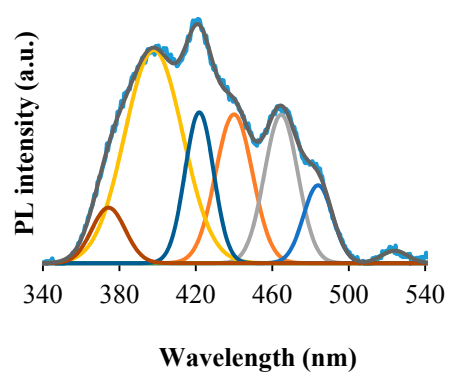

(b)  $[\text{AA-TiO}_2]_A$

**Figure S3.** Gaussian fitted PL spectra of  $[\text{TiO}_2]_A$  (a) and  $[\text{AA-TiO}_2]_A$  (b), dotted line: fitting of deconvolution study.
